# Supplementary material for: Immune Profiles in Multisystem Inflammatory Syndrome in Children with Cardiovascular Abnormalities
Source: MDPI journal article supplement (doi:10.3390/v15112162), 2023-10-27
Supplement: s1 [file s1]

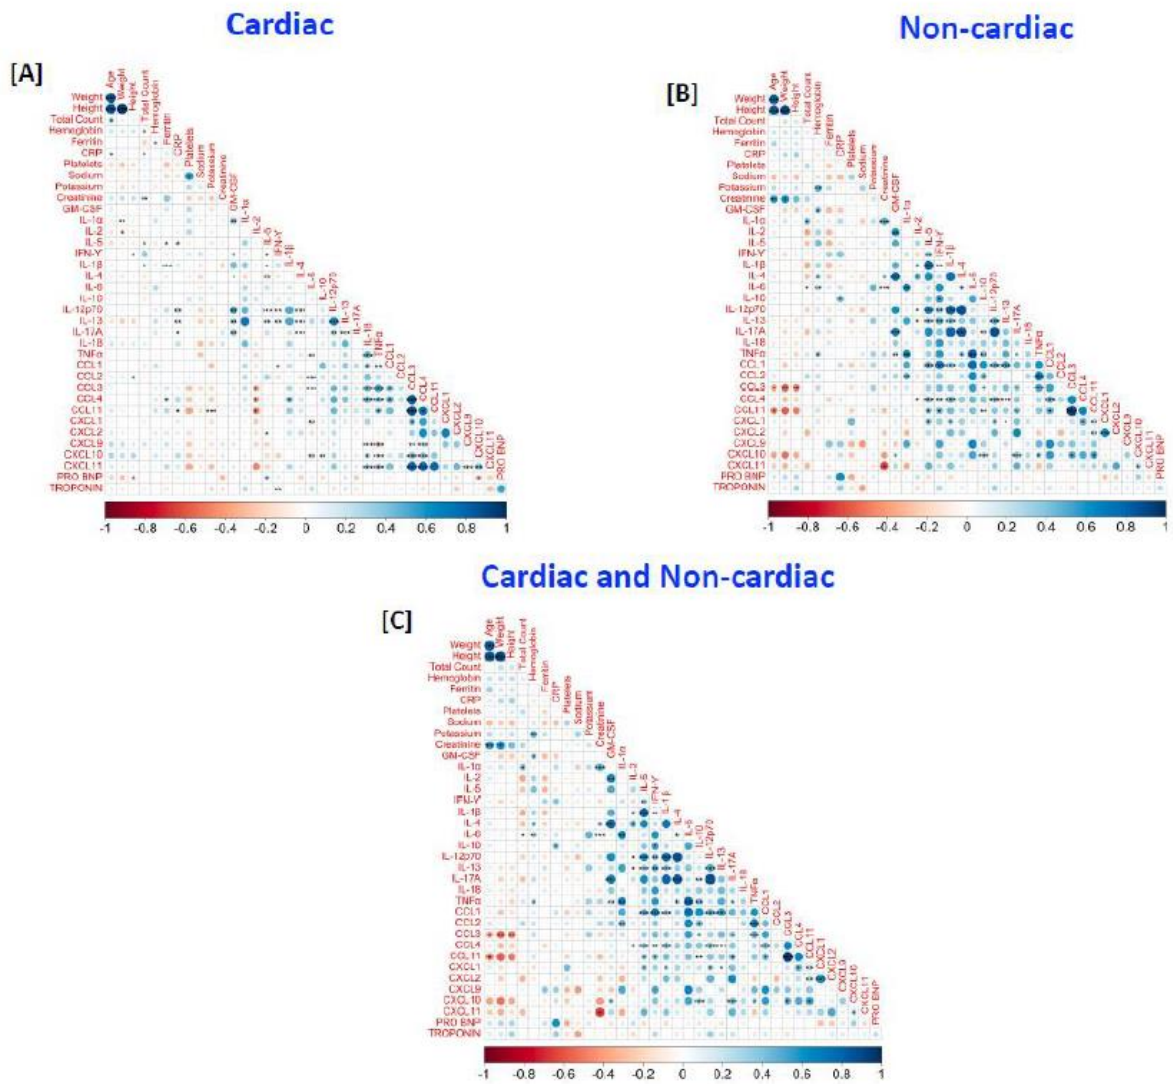

**Figure S1.** Relationship between Immune markers and biochemical parameters. Multiparametric matrix correlation plot of immune markers and biochemical parameters in all individuals of MIS-C with and without cardiac manifestations. Spearman's correlation coefficients are visualized by colour intensity. P values are ordered by hierarchical clustering.
